# Supplementary material for: Natural marine bromoform emissions in the fully coupled ocean-atmosphere-model NorESM2
Source: Copernicus journal article supplement (doi:10.5194/esd-2024-3), 2024-01-23
Supplement: Supplementary file 1 [file esd-2024-3-supplement.pdf]

1 **Supplement to**

2  
3 **Natural marine bromoform emissions in the fully coupled**  
4 **ocean-atmosphere-model NorESM2**  
5

6 Dennis Booge<sup>1,2</sup>, Jerry F. Tjiputra<sup>3</sup>, Dirk J. L. Olivié<sup>4</sup>, Birgit Quack<sup>1</sup> and Kirstin Krüger<sup>2</sup>

7 <sup>1</sup>GEOMAR Helmholtz Centre for Ocean Research Kiel, Kiel, 24105, Germany

8 <sup>2</sup>Department of Geosciences, Section of Meteorology and Oceanography, University of Oslo, Oslo, 0371, Norway

9 <sup>3</sup>NORCE Norwegian Research Centre and Bjerknes Centre for Climate Research, Bergen, 5007, Norway

10 <sup>4</sup>Norwegian Meteorological Institute, Oslo, 0313, Norway

11 *Correspondence to:* Dennis Booge (dbooge@geomar.de) and Kirstin Krüger (kkrueger@geo.uio.no)

12  
13  
14 **Contents of this file**

15 Figures S1 to S3

16 Table S1  
17  
18  
19  
20  
21  
22  
23  
24  
25  
26  
27  
28  
29  
30  
31  
32  
33  
34  
35  
36  
37  
38  
39  
40  
41  
42  
43  
44  
45

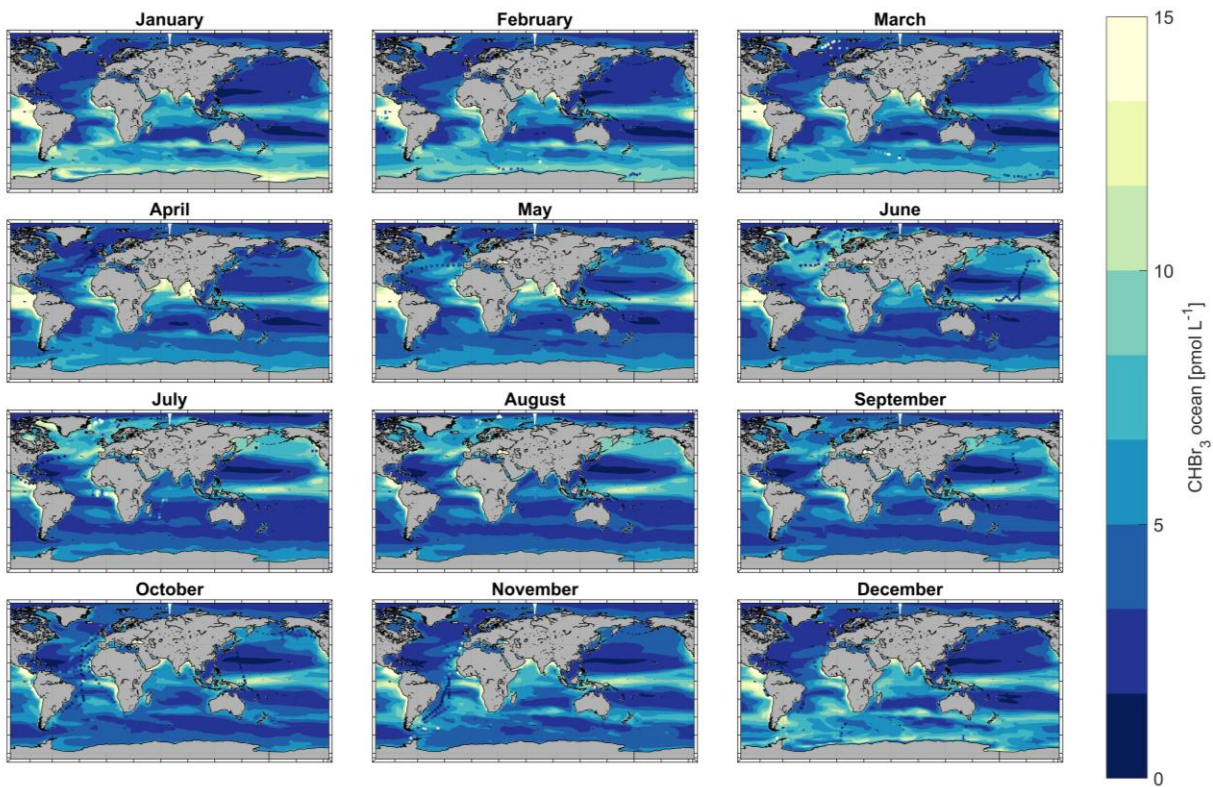

46 **Figure S1: Monthly resolved daily mean oceanic bromoform concentrations from HalOcat on top of**  
 47 **monthly mean oceanic bromoform data (1990-2014) from NorESM2.**

48  
 49  
 50

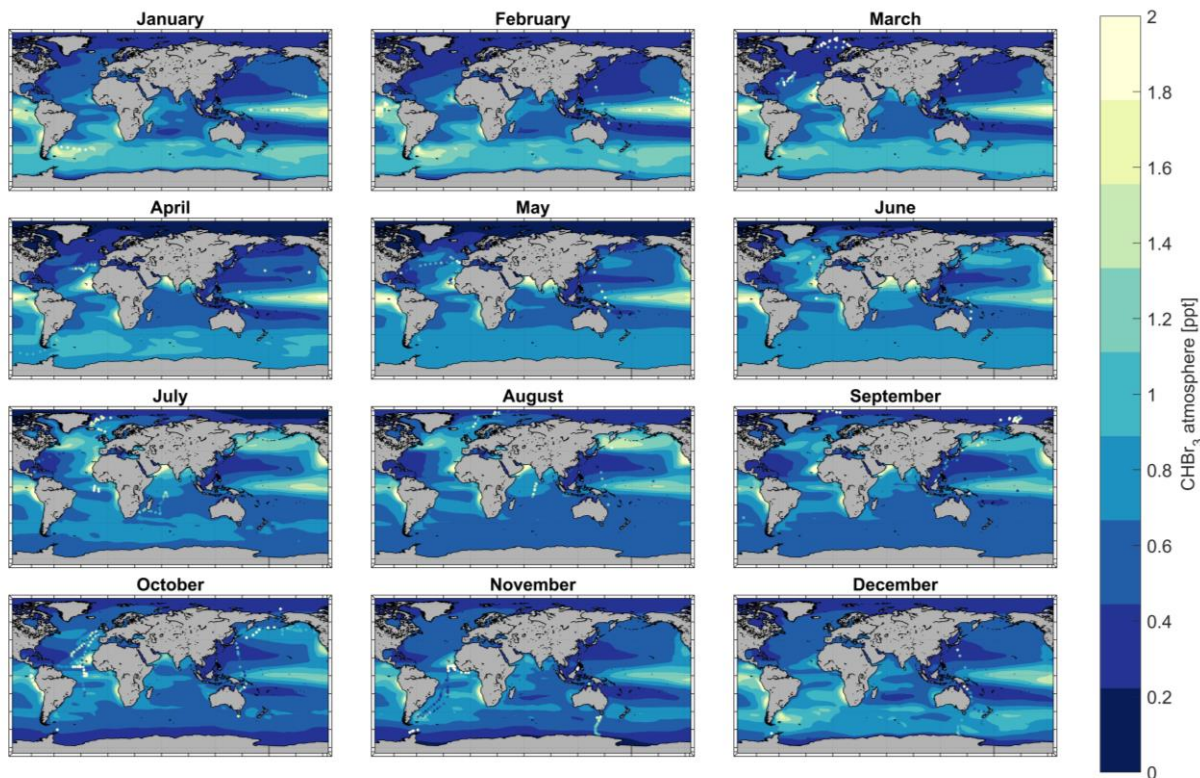

51  
 52 **Figure S2: Monthly resolved daily mean atmospheric bromoform mixing ratios from HalOcat on top of**  
 53 **monthly mean atmospheric bromoform data (1990-2014) from NorESM2.**  
 54

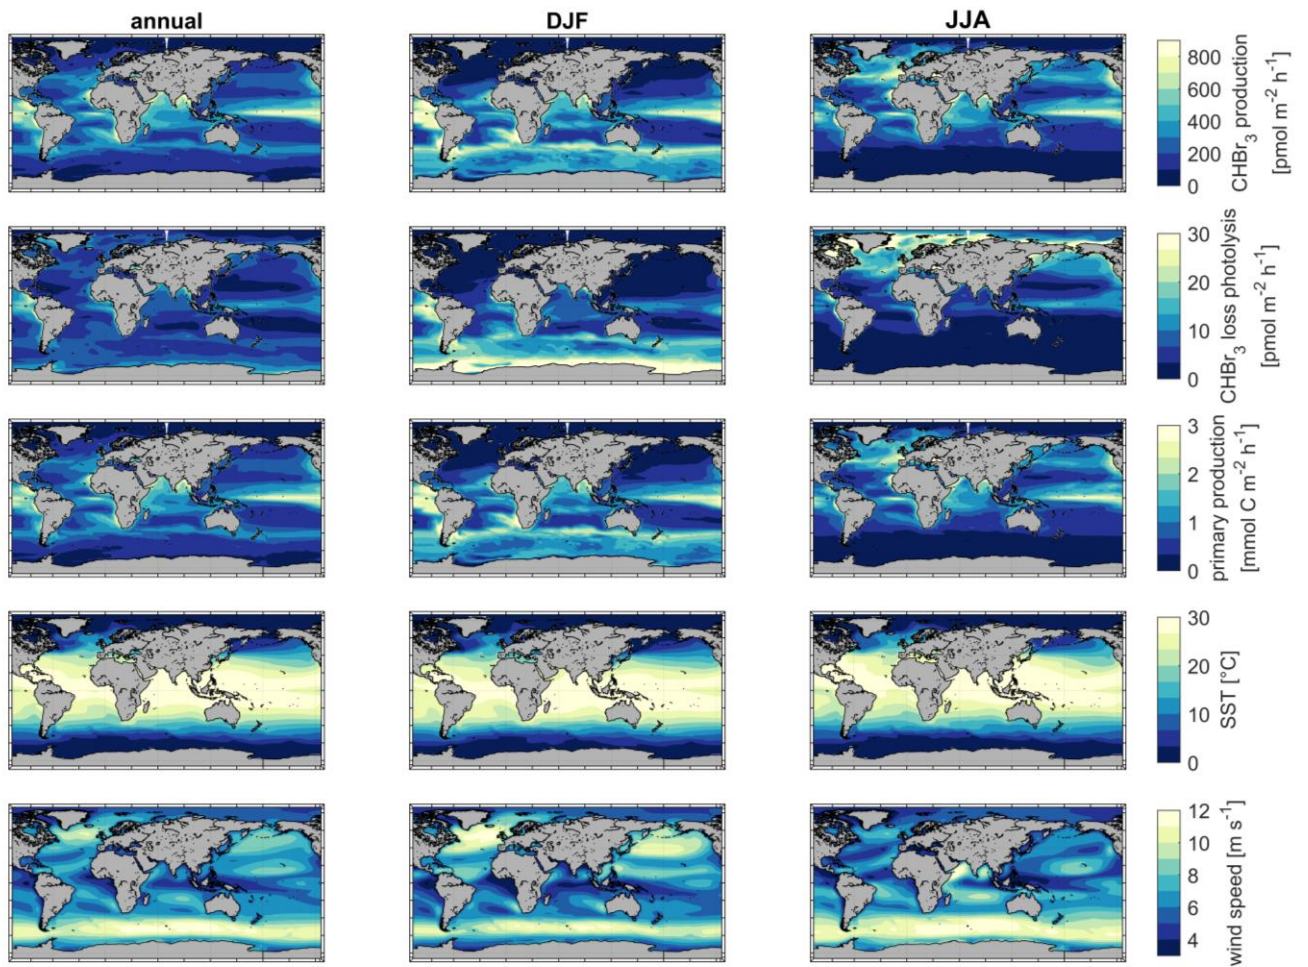

55 **Figure S3: Annual (left), DJF (middle) and JJA (right) mean oceanic surface integrated bromoform**  
 56 **production rates (upper panel), bromoform loss rates due to photolysis (second upper panel), integrated**  
 57 **primary production (middle panel), SST (second lower panel) and wind speed (lower panel) from NorESM2.**

58  
 59  
 60  
 61  
 62  
 63  
 64  
 65  
 66  
 67  
 68  
 69  
 70  
 71  
 72  
 73

74 **Table S1: Annual and seasonal coefficients of the main predictors (driving factor) for each MLR in the**  
75 **different case studies. If the highest coefficient was not significantly different to the second or third highest**  
76 **coefficient, more than one coefficient including the respective parameters are listed. Atm: atmospheric**  
77 **mixing ratio, Prod: bromoform production, Ocean: ocean concentration, SST: sea surface temperature,**  
78 **WS: wind speed.**

|                          | Season | North Atlantic  |                    | Tropical West Pacific |              | Southern Ocean |             |
|--------------------------|--------|-----------------|--------------------|-----------------------|--------------|----------------|-------------|
|                          |        | Parameter       | Coefficient        | Parameter             | Coefficient  | Parameter      | Coefficient |
| Ocean concentration      | Annual | Atm             | 0.68               | WS                    | -0.96        | Atm            | 0.60        |
|                          | DJF    | Atm             | 0.98               | WS                    | -0.95        | Atm            | 0.80        |
|                          | MAM    | Prod   Atm      | 0.64   0.41        | WS                    | -0.92        | Prod           | 0.82        |
|                          | JJA    | Atm   Prod      | 1.15   0.86        | Atm   Prod            | -0.58   0.49 | Atm            | 1.26        |
|                          | SON    | Prod            | 0.72               | Prod                  | 0.85         | SST            | -0.75       |
| Atmospheric mixing ratio | Annual | Ocean           | 0.93               | WS                    | 0.94         | Ocean          | 1.07        |
|                          | DJF    | SST             | 1.01               | WS                    | 0.93         | Ocean          | 1.00        |
|                          | MAM    | Ocean           | 1.33               | WS                    | 0.92         | SST            | 0.92        |
|                          | JJA    | SST   Ocean     | 0.59   0.53        | WS   Ocean            | 0.51   0.42  | SST            | 0.67        |
|                          | SON    | Ocean           | 0.79               | WS                    | 0.77         | Ocean          | 1.62        |
| Bromoform emissions      | Annual | Ocean           | 0.83               | WS                    | 1.27         | Atm            | -1.22       |
|                          | DJF    | SST   Atm       | 2.05   -1.26       | WS                    | 1.55         | SST            | 1.16        |
|                          | MAM    | Prod   SST   WS | 0.79   0.67   0.63 | WS                    | 1.31         | Ocean          | 0.59        |
|                          | JJA    | WS   Ocean      | 0.60   0.60        | WS   SST              | 0.68   0.52  | Atm            | -0.88       |
|                          | SON    | SST             | 0.81               | WS                    | 1.11         | Atm            | -1.00       |

79
